# Supplementary material for: Characteristics of the pH-regulated aggregation-induced enhanced emission (AIEE) and nanostructure orchestrate via self-assembly of naphthalenediimide–tartaric acid bola-amphiphile: role in cellular uptake
Source: Royal Society of Chemistry journal article supplement (doi:10.1039/d0nj05845a), 2021-01-01
Supplement: d0nj05845a1.pdf [file d0nj05845a1.pdf]

## Supplementary Information

### **Characteristics of pH-regulated aggregation-induced enhanced emission (AIEE) and nanostructure orchestrate via self-assembly of naphthalenediimide-tartaric acid bola-amphiphile: Role in cellular uptake**

Sopan M. Wagalgave,<sup>a,b</sup> Mahmood D. Aljabri,<sup>c</sup> Keerti Bhamidipati,<sup>b,d</sup> Deepak A. Shejule,<sup>a</sup> Dinesh N. Nadimetla,<sup>d</sup> Mohammad Al Kobaisi,<sup>c</sup> Nagaprasad Puvvada,<sup>b,d</sup> Sidhanath V. Bhosale,<sup>a,b,\*</sup> Sheshanath V. Bhosale<sup>e,\*</sup>

<sup>a</sup> Polymers and Functional Materials Division CSIR-Indian Institute of Chemical Technology, Hyderabad 500007, Telangana, India.

<sup>b</sup> Academy of Scientific and Innovative Research (AcSIR), Ghaziabad-201002, India.

<sup>c</sup> School of Science, RMIT University, GPO Box 2476, Melbourne, Victoria 3001, Australia.

<sup>d</sup> Applied Biology Division CSIR-Indian Institute of Chemical Technology, Hyderabad 500007, Telangana, India.

<sup>e</sup> School of Chemical Sciences, Goa University, Taleigao Plateau, Goa-403206, India.

**Corresponding authors:** S.V.B. (CSIR-IICT): [bhosale@iict.res.in](mailto:bhosale@iict.res.in) S.V.B. (G.U.)

[svbhosale@unigoa.ac.in](mailto:svbhosale@unigoa.ac.in)

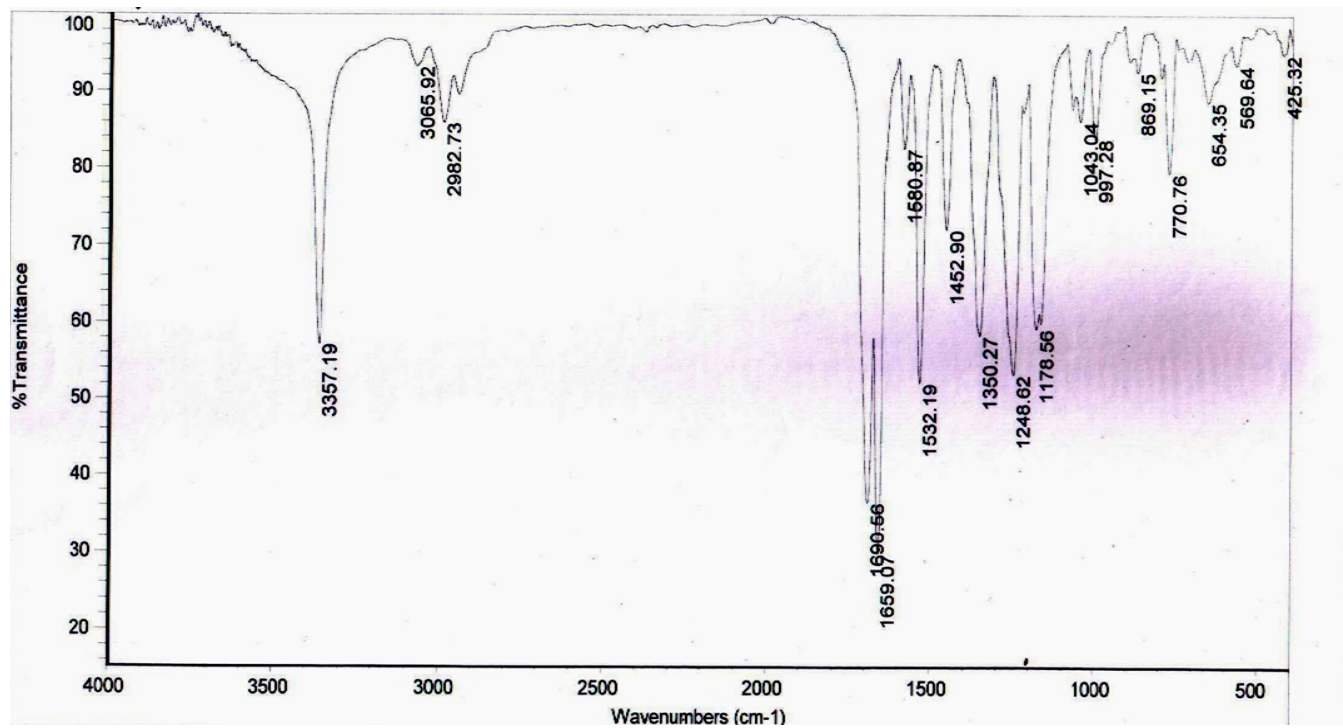

Fig. S1. FT-IR spectra of compound 3

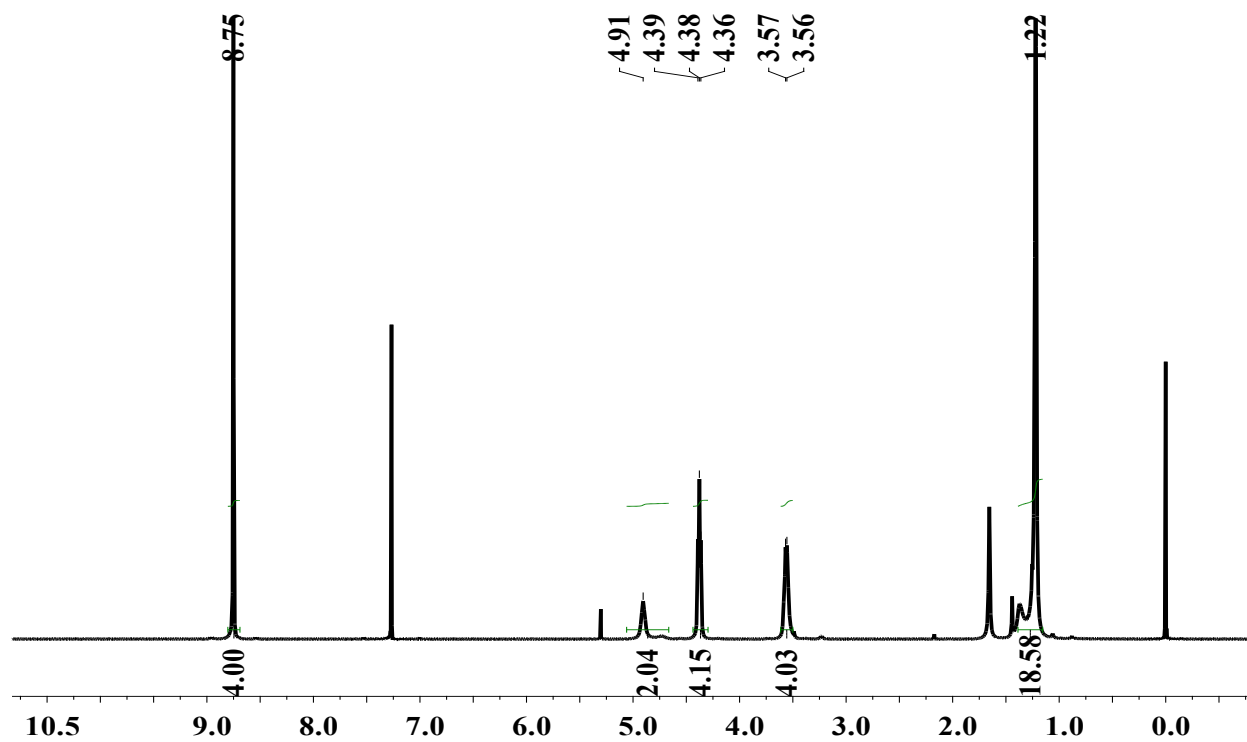

Fig. S2. <sup>1</sup>H NMR spectra of compound 3

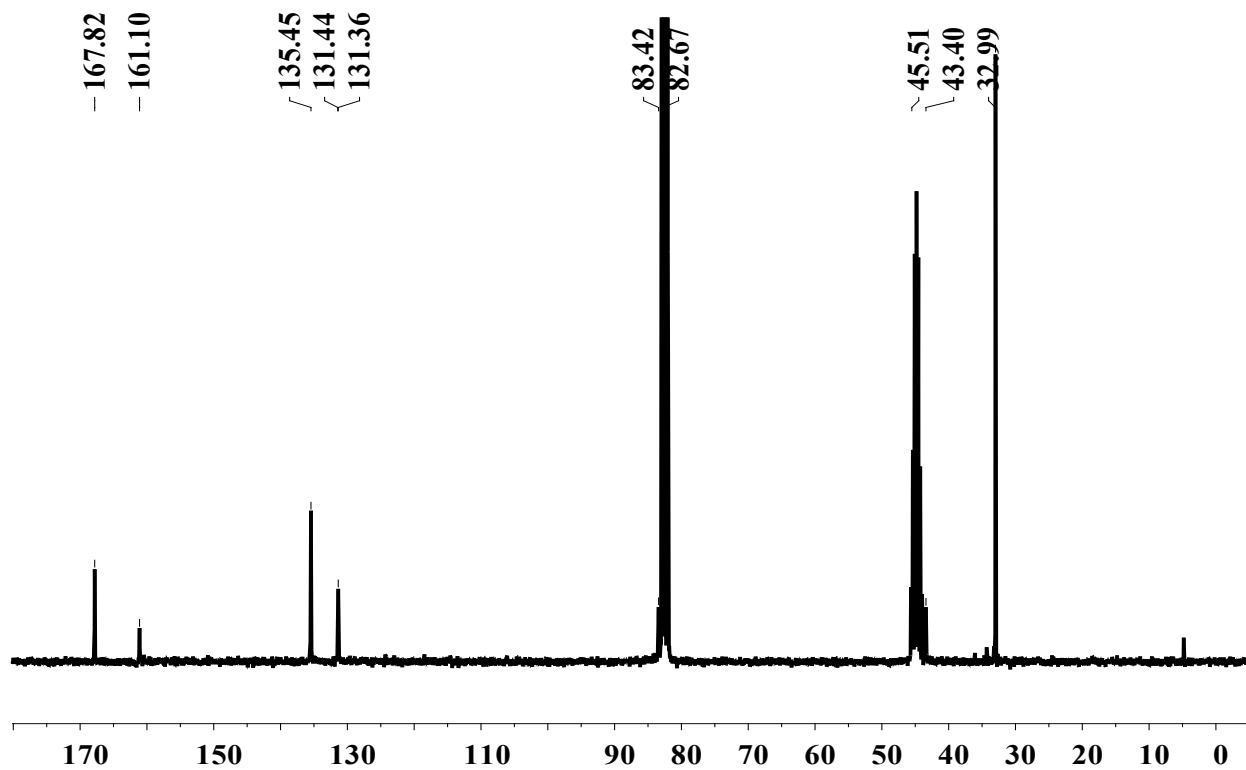

Fig. S3. <sup>13</sup>C NMR spectra of compound 3

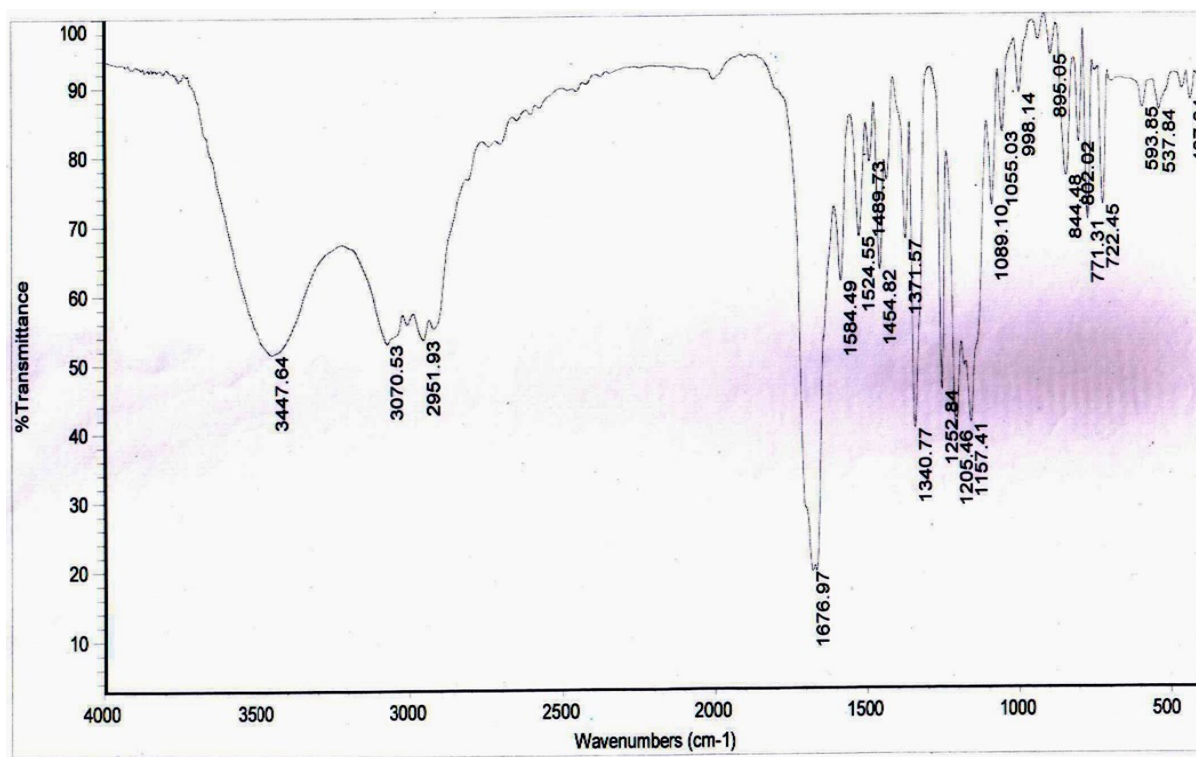

Fig. S4. FT-IR spectra of compound 4

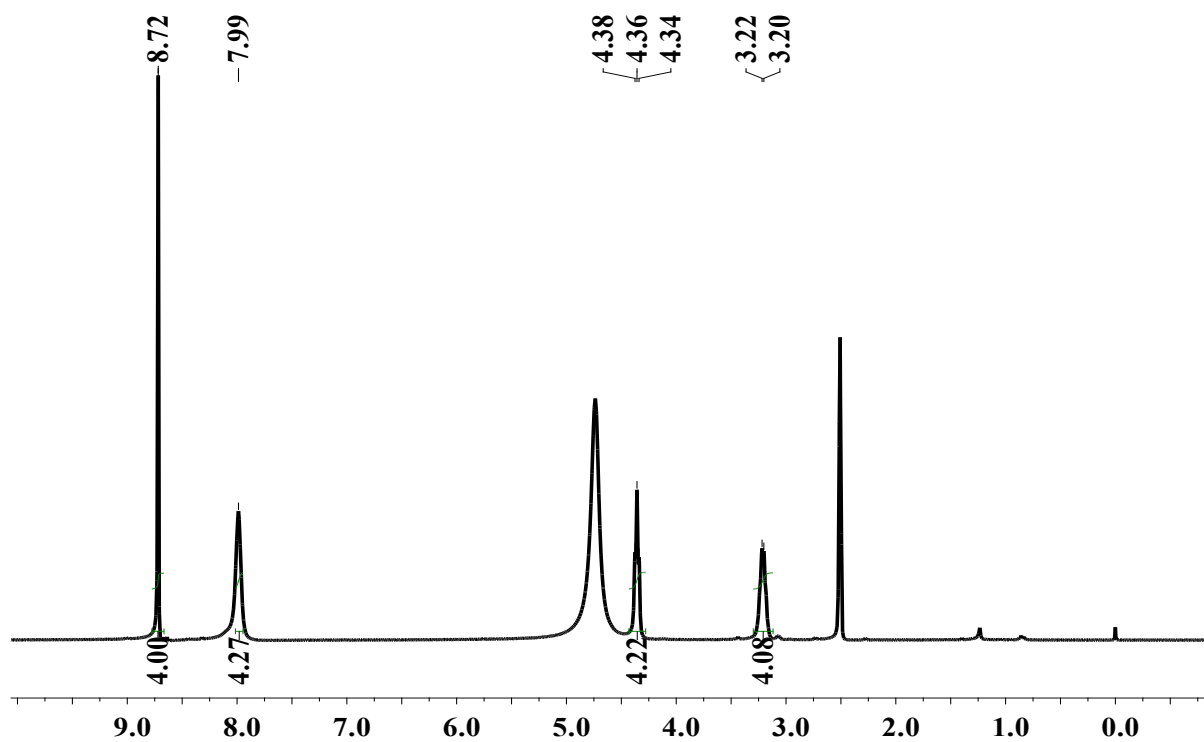

Fig. S5. <sup>1</sup>H NMR spectra of compound 4

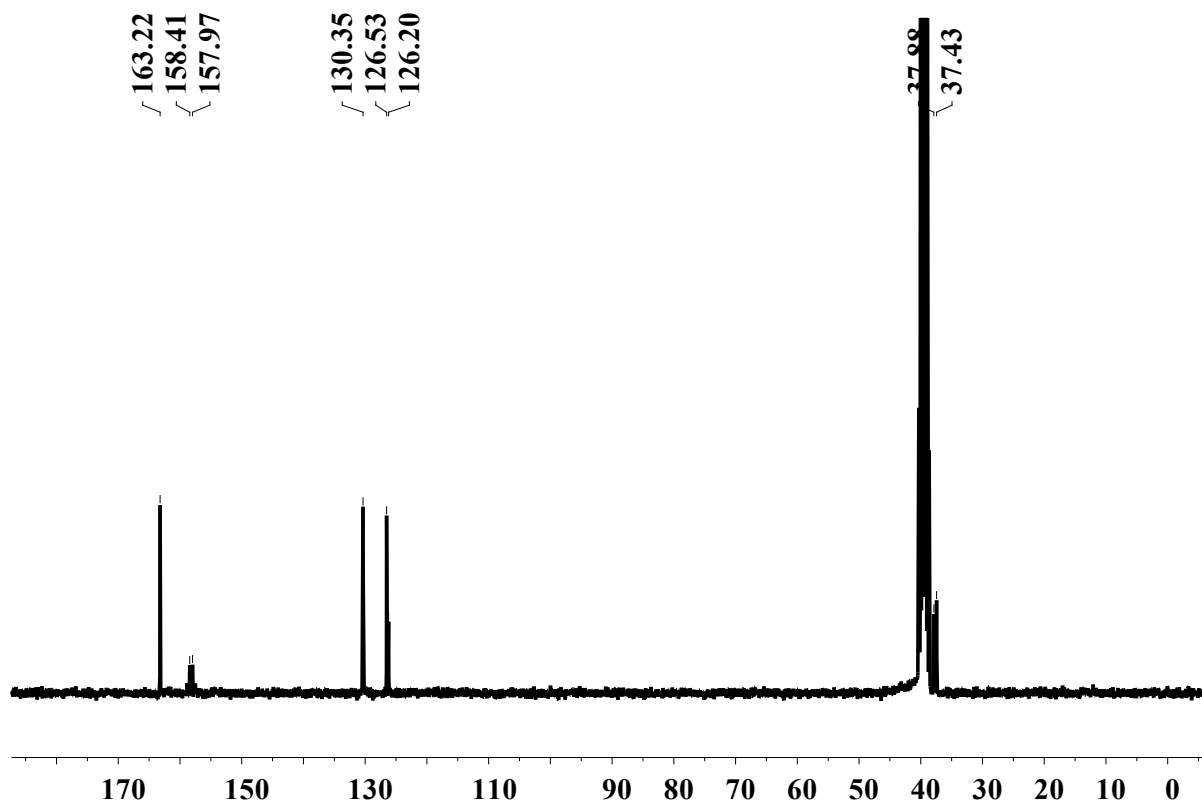

Fi

g. S6.  $^{13}\text{C}$  NMR spectra of compound 4

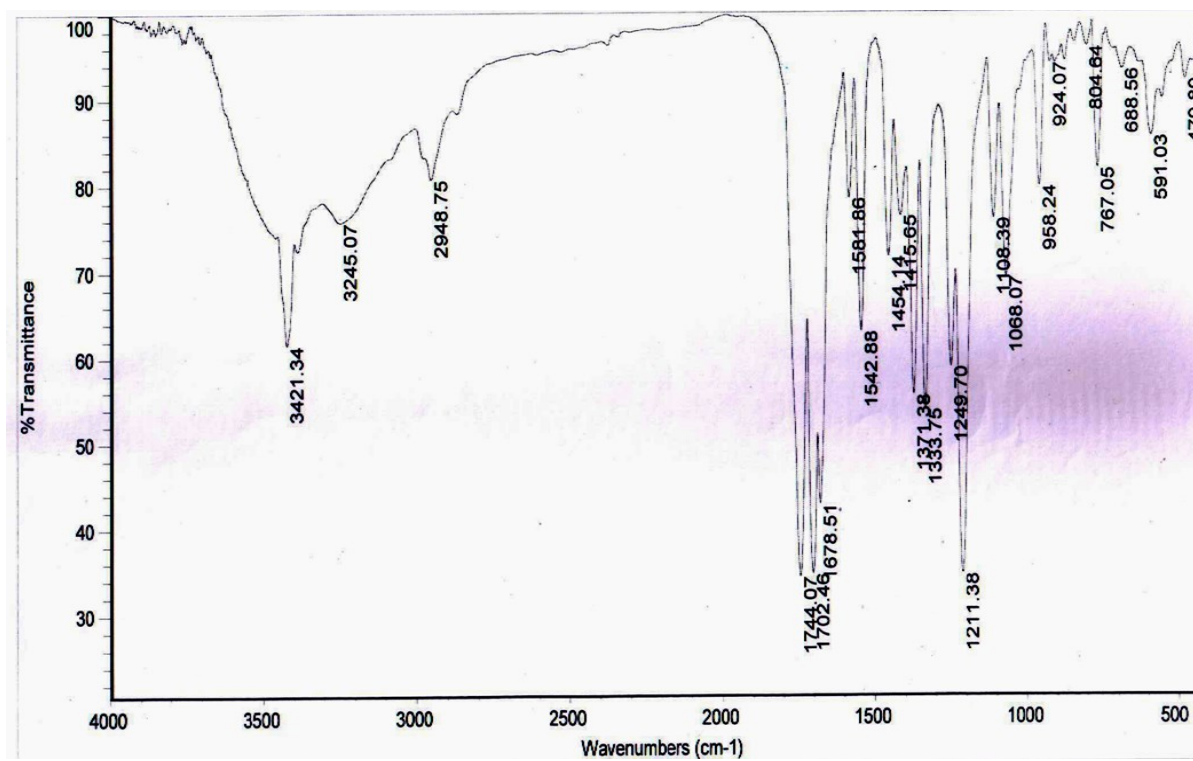

Fig. S7. FT-IR spectra of NDI-TA

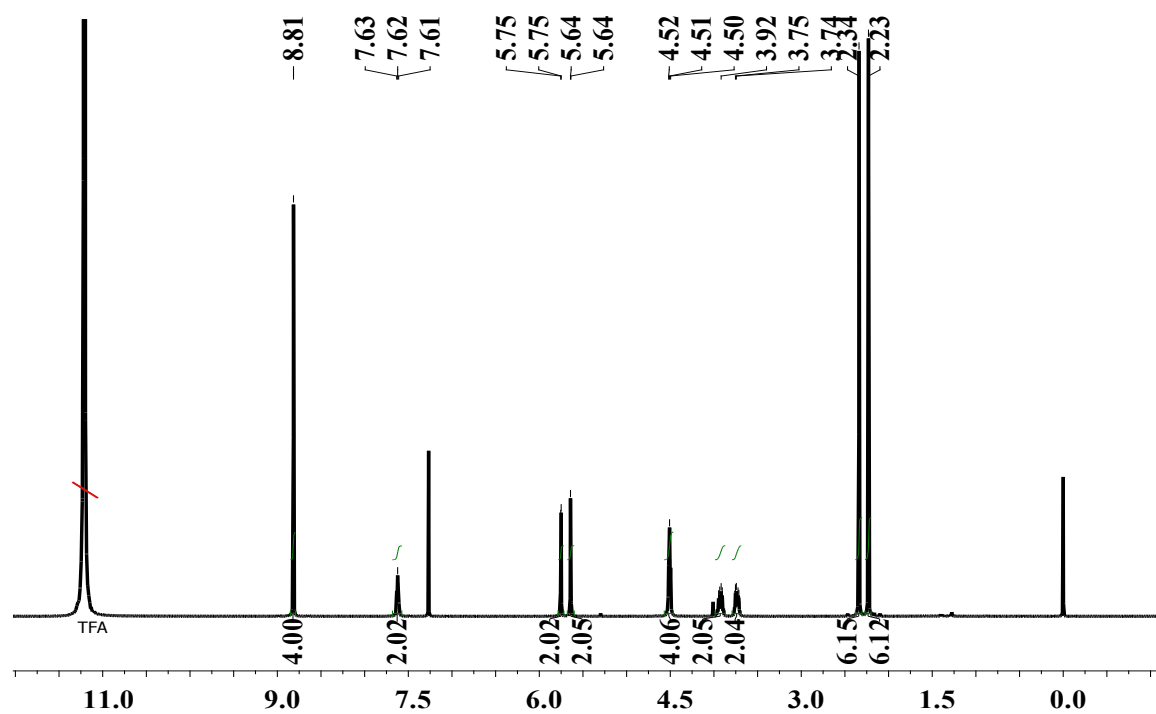

Fig. S8.  $^1\text{H}$  NMR of NDI-TA

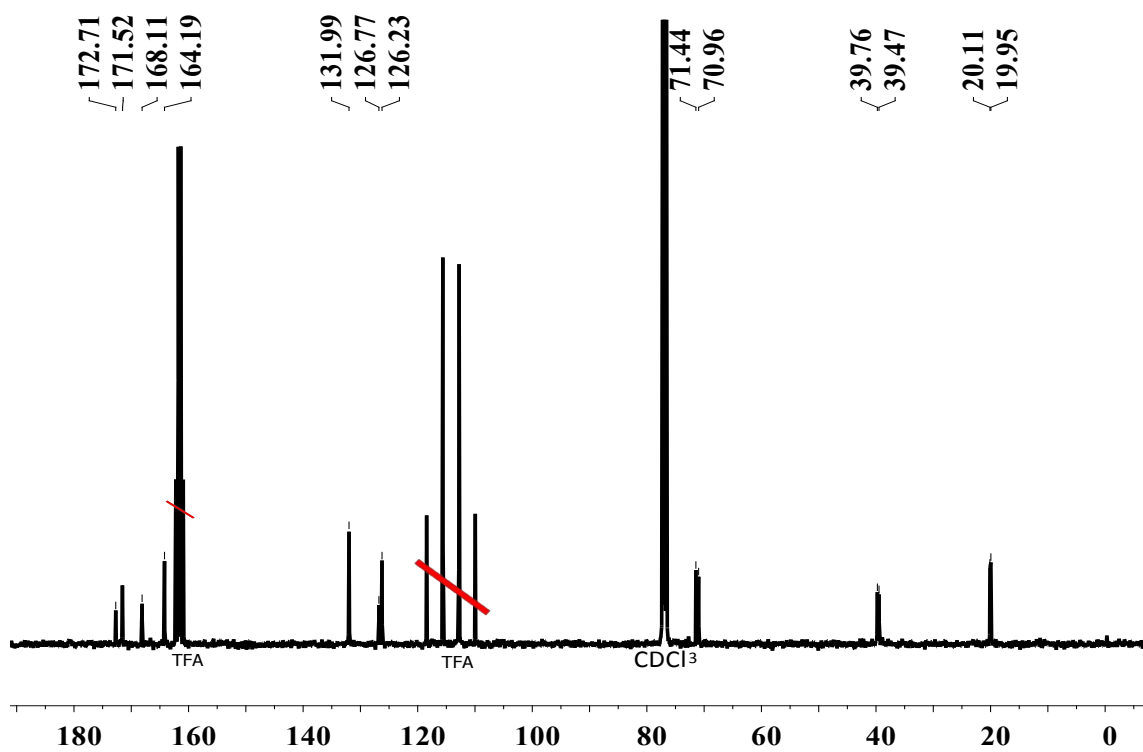

Fig. S9.  $^{13}\text{C}$  NMR spectra of NDI-TA

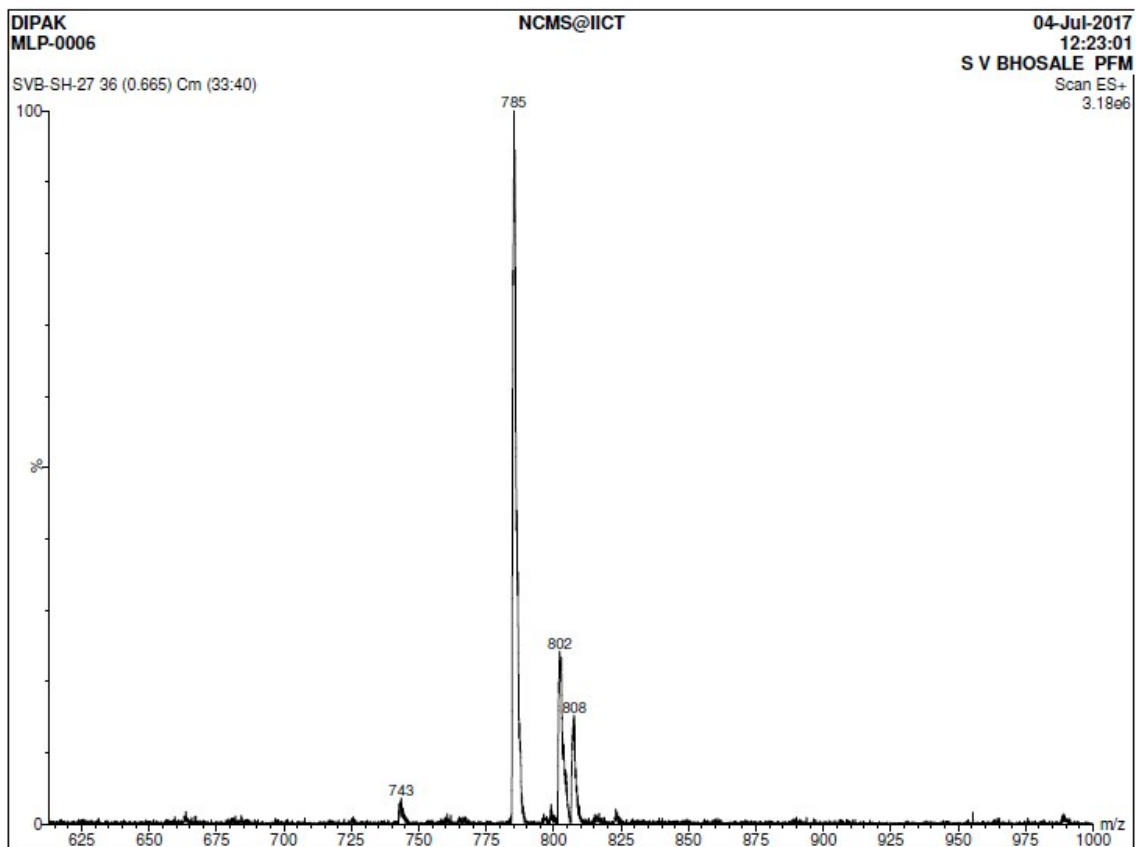

**Fig. S10.** ESI-MS Spectrum of NDI-TA

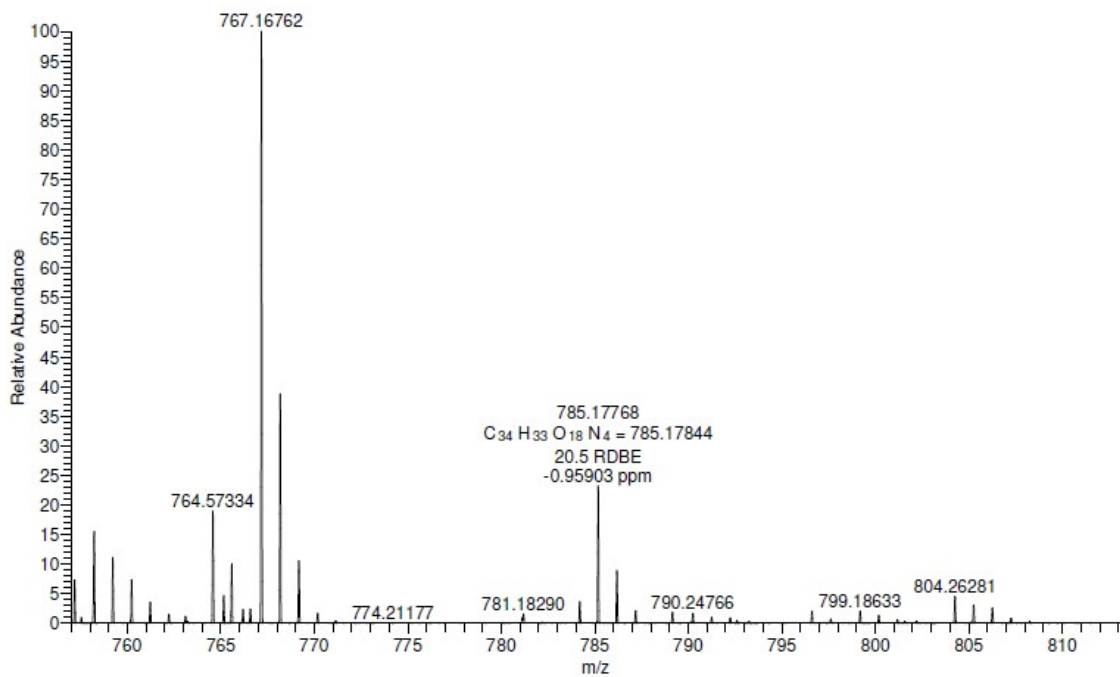

**Fig. S11.** HRMS Spectrum of NDI-TA

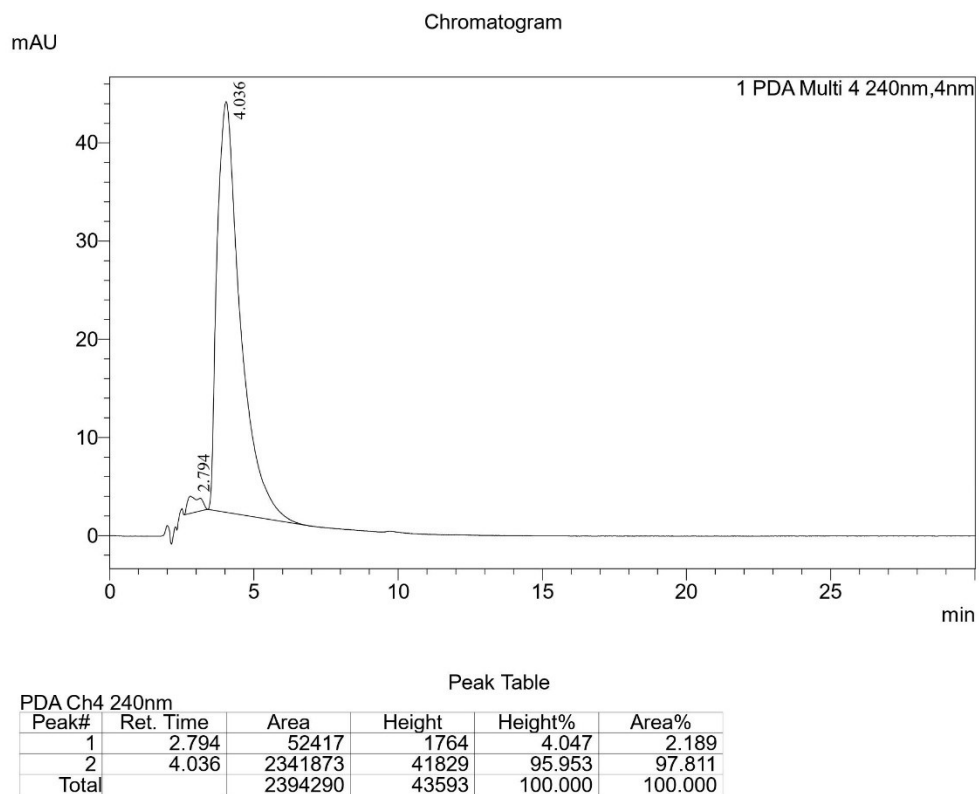

**Fig. S12.** HPLC analysis of NDI-TA.

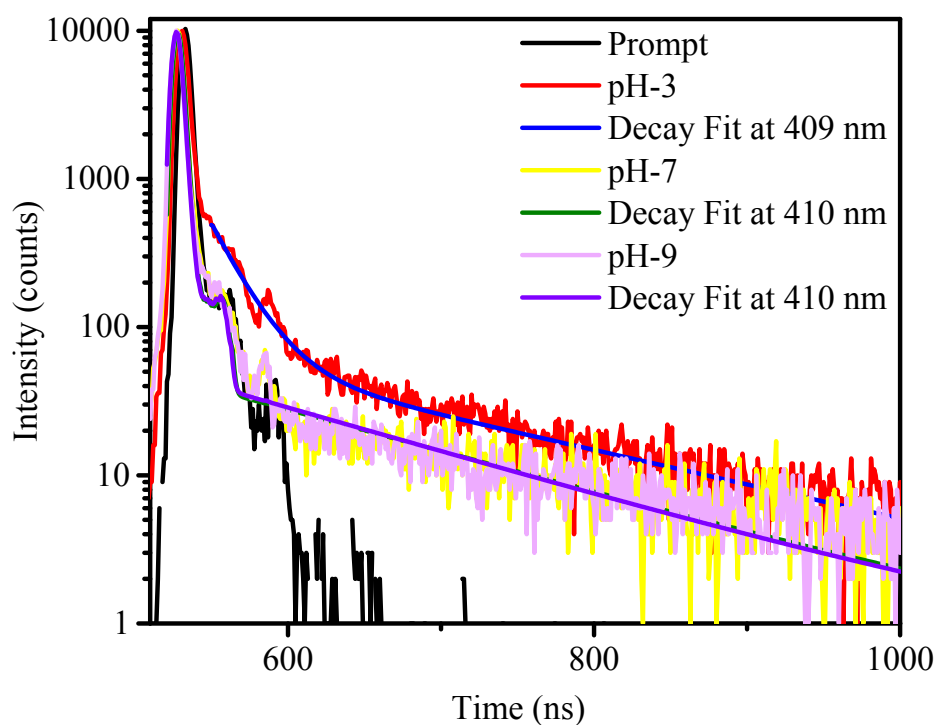

**Fig. S13.** Fluorescence decay of NDI-TA; pH-3, pH-7 and pH-9 ( $\lambda_{ex}$  = 370 nm)



**Table S1.** Fluorescence decay in difference pH solution of NDI-TA.

| Sample Code | $\tau_1$ (ns) | Contribution (%) | $\tau_2$ (ns) | Contribution (%) |
|-------------|---------------|------------------|---------------|------------------|
| pH-3        | 0.569         | 52.69            | 5.171         | 47.31            |
| pH-7        | 4.305         | 4.71             | 0.030         | 95.29            |
| pH-9        | 4.063         | 4.87             | 0.034         | 95.13            |

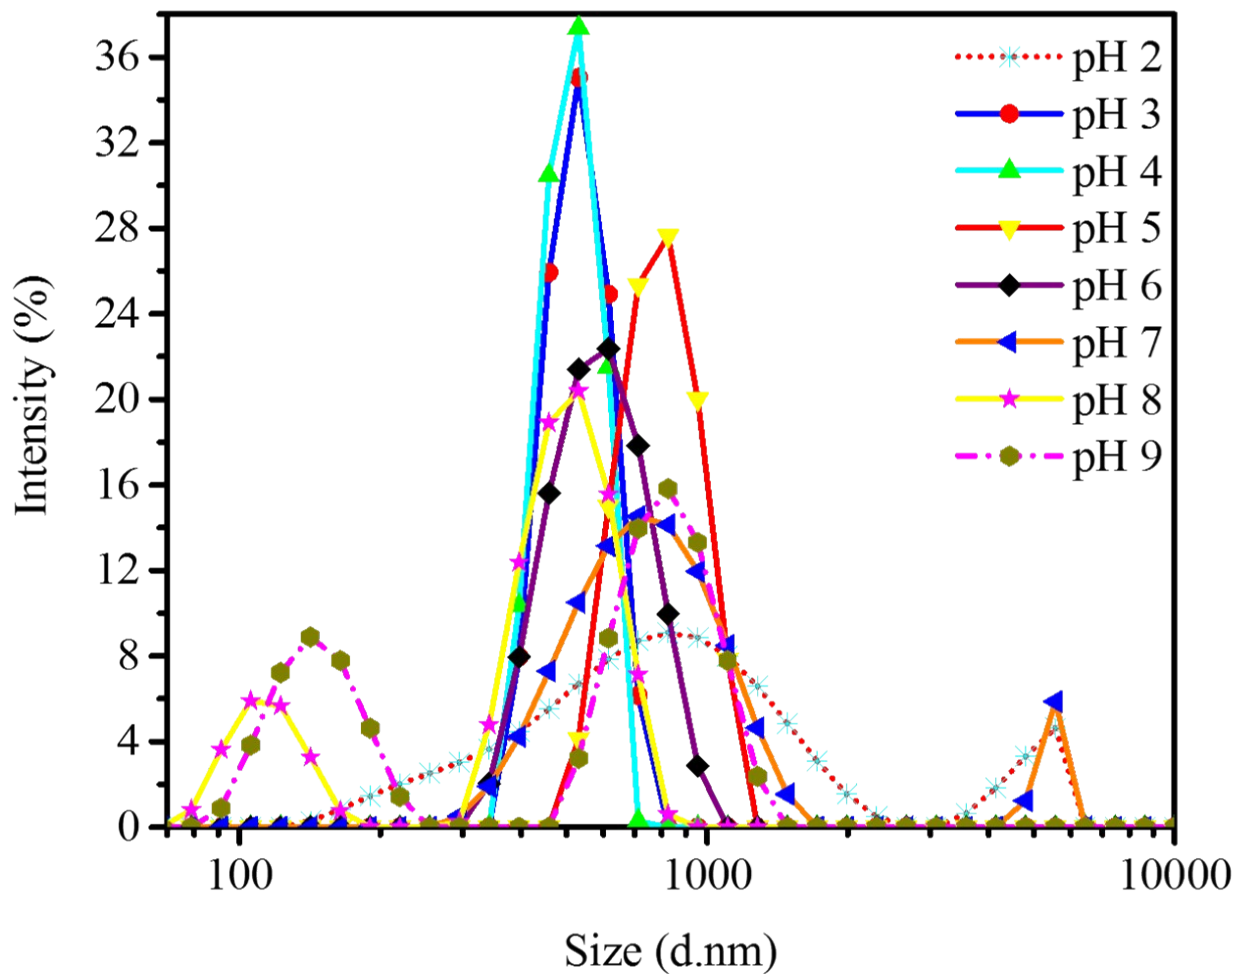

**Fig. S14.** Dynamic light scattering of NDI-TA at different pH.

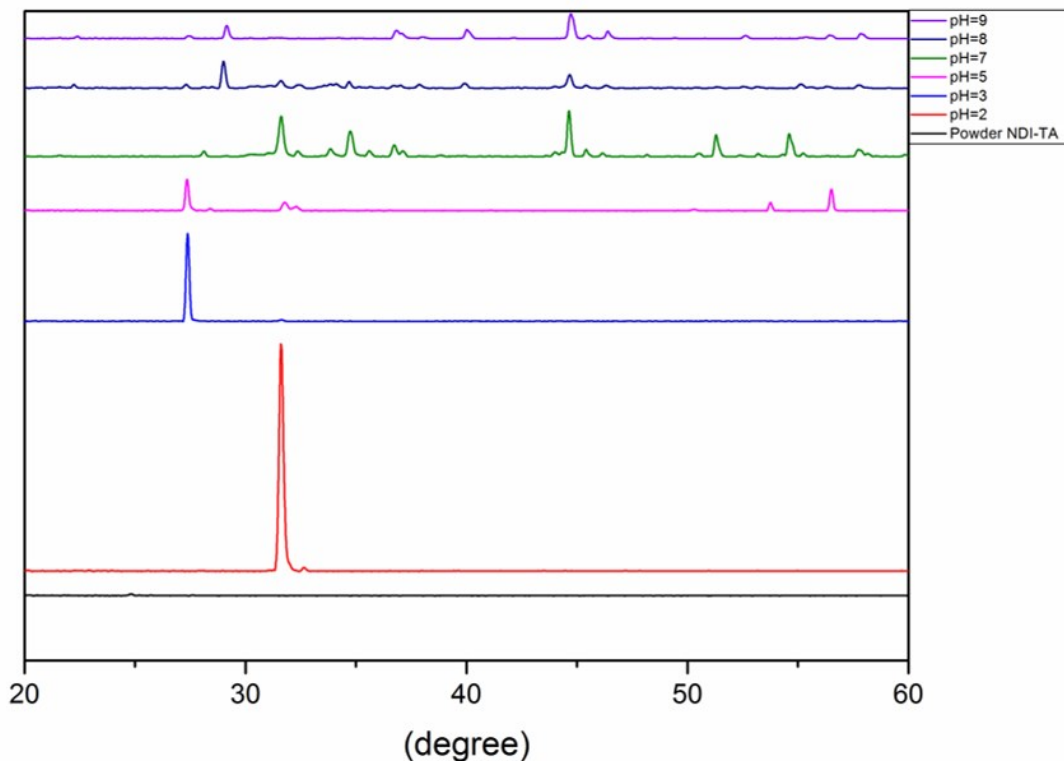

**Fig. S15.** X-ray powder diffraction (XRD) of pure NDI-TA powder and different pH solutions (2 to 9) which were deposited from the solutions.

**Table S2.** NDI-TA electronic transitions as calculated in vacuo using TDDFT at B3LYP/6-311+G(d,p) level of theory and Gauss-Sum 3.0 program.

| No. | Wavelength (nm) | $f$    | Major contributions              | Minor contributions           |
|-----|-----------------|--------|----------------------------------|-------------------------------|
| 1   | 393.7           | 0      | H-7→LUMO (95%)                   |                               |
| 2   | 389.0           | 0.0184 | H-4→LUMO (12%), HOMO→LUMO (86%)  |                               |
| 3   | 388.7           | 0      | H-3→LUMO (12%), H-1→LUMO (87%)   |                               |
| 4   | 383.0           | 0.0022 | H-5→LUMO (77%), H-4→LUMO (18%)   | HOMO→LUMO (4%)                |
| 5   | 382.8           | 0.3333 | H-2→LUMO (93%)                   | HOMO→LUMO (3%)                |
| 6   | 381.5           | 0.0011 | H-6→LUMO (62%), H-3→LUMO (30%)   | H-1→LUMO (6%)                 |
| 7   | 377.6           | 0.0003 | H-6→LUMO (34%), H-3→LUMO (57%)   | H-1→LUMO (7%)                 |
| 8   | 377.3           | 0.0494 | H-5→LUMO (21%), H-4→LUMO (67%)   | H-2→LUMO (4%), HOMO→LUMO (8%) |
| 9   | 376.4           | 0.0002 | H-11→LUMO (95%)                  | H-7→L+3 (2%)                  |
| 10  | 346.4           | 0      | H-16→LUMO (39%), H-12→LUMO (55%) |                               |
| 11  | 344.0           | 0.0257 | H-10→LUMO (61%), H-8→LUMO (27%)  | H-6→LUMO (2%), H-2→L+2 (5%)   |
| 12  | 329.4           | 0.0084 | H-17→LUMO (58%), H-15→LUMO (24%) | H-19→LUMO (8%), H-7→L+1 (3%)  |
| 13  | 321.4           | 0      | H-9→LUMO (95%)                   | H-16→LUMO (2%)                |
| 14  | 321.0           | 0.0012 | H-10→LUMO (30%), H-8→LUMO (69%)  |                               |
| 15  | 313.6           | 0      | H-16→LUMO (53%), H-12→LUMO (37%) | H-20→LUMO (4%), H-9→LUMO (4%) |

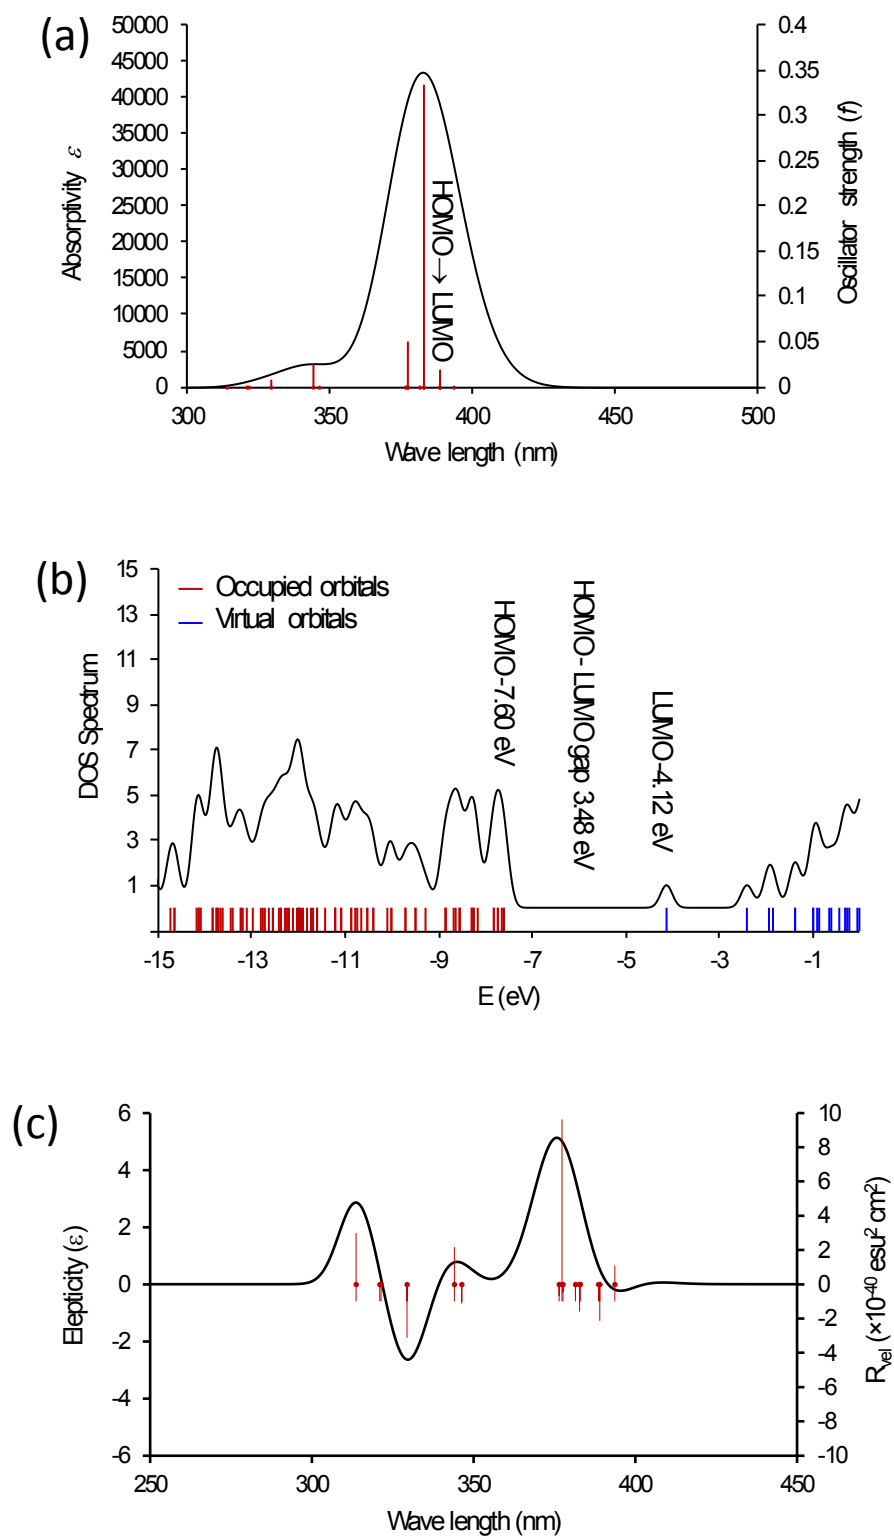

**Fig. S16.** The UV-vis (a) and DOS (b) spectra simulated using optical transitions of NDI-TA as calculated using TDDFT at B3LYP/6-311+G(d,p) level of theory and Gauss-Sum 3.0 program.
